# Supplementary material for: Pathway analysis of genes identified through Post-GWAS to understand prostate cancer aetiology
Source: Preprints.org preprint supplement (doi:10.20944/preprints201909.0045.v1), 2019-09-04
Supplement: Supplementary file 1 [file supplementary]

## Identifiers found:

Below is a list of the input identifiers that have been found or mapped to an equivalent element in Reactome, classified by resource.

### Entities (181)

| Input    | UniProt Id                                                                                                                 | Input    | UniProt Id            | Input    | UniProt Id                                                                                                                                                                         |
|----------|----------------------------------------------------------------------------------------------------------------------------|----------|-----------------------|----------|------------------------------------------------------------------------------------------------------------------------------------------------------------------------------------|
| ABR      | Q12979                                                                                                                     | ACAT2    | O75908                | AHRR     | A9YTQ3                                                                                                                                                                             |
| ANO7     | Q6IWH7                                                                                                                     | ARFGAP3  | Q9NP61                | ARFRP1   | Q13795                                                                                                                                                                             |
| ARHGAP12 | Q8IWW6                                                                                                                     | ARL3     | P36405                | ARL6IP5  | O75915                                                                                                                                                                             |
| ARNT     | P27540                                                                                                                     | AS3MT    | Q9HBK9                | ASAH1    | Q13510                                                                                                                                                                             |
| ASNS     | P08243                                                                                                                     | ATM      | Q13315                | ATP2B1   | P20020                                                                                                                                                                             |
| ATP9B    | O43861                                                                                                                     | AURKB    | Q96GD4                | B3GAT1   | Q9P2W7                                                                                                                                                                             |
| BMPR1B   | O00238                                                                                                                     | BRI3     | O95415                | CABLES2  | Q9BTV7                                                                                                                                                                             |
|          |                                                                                                                            |          | P47756                | CASP8    | Q14790                                                                                                                                                                             |
|          |                                                                                                                            |          |                       | CATSPERG | Q6ZRH7                                                                                                                                                                             |
| CDKN1B   | P46527                                                                                                                     | CFLAR    | O15519-1,<br>O15519-2 | CHMP2B   | Q9UQN3                                                                                                                                                                             |
| CHMP7    | Q8WUX9                                                                                                                     | COL23A1  | Q86Y22                | COL2A1   | P02458                                                                                                                                                                             |
| COMMD10  | Q9Y6G5                                                                                                                     | CPD      | O75976                | CREB3L4  | Q8TEY5                                                                                                                                                                             |
| CTBP1    | Q13363                                                                                                                     | CTBP2    | P56545                | CTSK     | P43235                                                                                                                                                                             |
| CTSS     | P25774                                                                                                                     | DDX52    | Q9Y2R4                | DTX4     | Q9Y2E6                                                                                                                                                                             |
| EEFSEC   | P57772                                                                                                                     | EIF4B    | P23588                | FAM96B   | Q9Y3D0                                                                                                                                                                             |
| FGFR2    | P21802, P21802-1, P21802-18,<br>P21802-3, P21802-5                                                                         | GCHFR    | P30047                | GEMIN4   | P57678                                                                                                                                                                             |
| GGCX     | P38435                                                                                                                     | GJB1     | P08034                | GOT2     | P00505                                                                                                                                                                             |
| GPR143   | P51810                                                                                                                     | GPRC6A   | Q5T6X5                | GRHL1    | Q9NZI5                                                                                                                                                                             |
| GUCA1B   | Q9UMX6                                                                                                                     | GUCY2D   | Q02846                | HAAO     | P46952                                                                                                                                                                             |
|          |                                                                                                                            |          |                       |          | P01891, P01892, P04439, P05534, P10314,<br>P10316, P13746, P16188, P16189, P16190,<br>P18462, P30443, P30447, P30450, P30453,<br>P30455, P30456, P30457, P30459, P30512,<br>Q09160 |
| HAPLN1   | P10915                                                                                                                     | HAUS6    | Q7Z4H7                | HLA-A    |                                                                                                                                                                                    |
| HLA-C    | P04222, P10321, P30499,<br>P30501, P30504, P30505,<br>P30508, P30510, Q07000,<br>Q29865, Q29960, Q29963,<br>Q95604, Q9TNN7 | HLA-DQA1 | P01906,<br>P01909     | HLA-DQA2 | P01906                                                                                                                                                                             |
| HLA-DQB1 | P01920, P05538                                                                                                             | HLA-DQB2 | P05538                | HLA-DRB1 | P01911, P01912, P04229, P04440, P05538,<br>P13760, P13761, P20039, Q29974,<br>Q30134, Q30154, Q30167, Q5Y7A7,<br>Q95IE3, Q9GIY3, Q9TQE0                                            |
| HLA-DRB5 | Q30154                                                                                                                     | HLA-E    | P13747                | HLA-F    | P30511                                                                                                                                                                             |
| HLA-G    | P17693                                                                                                                     | HLA-H    | P01893                | HNFB1    | P35680                                                                                                                                                                             |
| ITGA6    | P23229                                                                                                                     | KCNK6    | Q9Y257                | KCNN3    | Q9UGI6                                                                                                                                                                             |
| KDM6B    | O15054                                                                                                                     | KDSR     | Q06136                | KLK2     | P20151                                                                                                                                                                             |
| KLK3     | P03952                                                                                                                     | KRT18    | P05783                | KRT8     | P04264, P05787                                                                                                                                                                     |
| KRT86    | O43790, P78385, Q14533                                                                                                     | LASS2    | Q96G23                | LGMN     | Q99538                                                                                                                                                                             |
| LILRB2   | Q8N423                                                                                                                     | LOXL2    | Q9Y4K0                | LYVE1    | Q9Y5Y7                                                                                                                                                                             |
| MAP2K1   | Q02750                                                                                                                     | MAPRE1   | Q15691                | MCAT     | Q8IVS2                                                                                                                                                                             |
| MCM3     | P25205                                                                                                                     | MDM4     | O15151                | MICA     | Q29983                                                                                                                                                                             |

| Input    | UniProt Id     | Input   | UniProt Id        | Input    | UniProt Id         |
|----------|----------------|---------|-------------------|----------|--------------------|
| MMP16    | P51512         | MMP7    | P08254,<br>P09237 | MPHOSPH6 | Q99547             |
| MRPL18   | Q9H0U6         | MYB     | P10242            | MYC      | P01106             |
| MYO6     | Q9UM54         | MYO9B   | Q13459            | NDUFA9   | Q16795             |
| NOTCH4   | Q99466         | NT5C2   | P49902            | NUDT10   | Q8NFP7, Q96G61     |
| NUDT11   | Q96G61         | NUDT13  | Q86X67            | OR13A1   | Q8NGR1             |
| P2RX2    | Q9UBL9         | PCYOX1L | Q8NBM8            | PDCD4    | Q53EL6             |
| PDLIM5   | Q96HC4         | PGD     | P52209            | PHC3     | Q8NDX5             |
| PIK3C2B  | O00750         | PLCD1   | P51178            | PLOD2    | O00469             |
| PMVK     | Q15126         | POLI    | Q9UNA4            | PPA2     | Q15181, Q9H2U2     |
| PPP1R14A | Q96A00         | PRR3    | Q9NQS3            | PSMB7    | Q99436             |
| PSMD5    | Q16401         | PYGB    | P11216            | RAB17    | Q9H0T7             |
| RAB7L1   | O14966         | RAD51C  | O43502            | RAD9A    | Q99638             |
| RALB     | P11234         | RFX6    | Q8HWS3            | RGS17    | Q9UGC6             |
| RPL22L1  | Q6P5R6         | RPL3    | P39023            | RPS9     | P46781             |
| RUVBL1   | Q9Y265         | SEPT2   | Q15019            | SESN1    | Q9Y6P5-1, Q9Y6P5-3 |
| SKIL     | P12757         | SLC22A2 | O15244            | SLC22A3  | O75751             |
| SLC25A37 | Q9NYZ2         | SLC39A1 | Q9NP94,<br>Q9NY26 | SLC41A1  | Q8IVJ1             |
| SLC7A3   | Q8WY07         | SLC9A8  | Q9Y2E8            | SNRPC    | P09234             |
| SOX9     | P48436         | SPINT2  | O43291            | STARD8   | Q92502             |
| STC2     | O76061         | STXBP1  | P61764            | SUPT4H1  | P63272             |
| SUV420H1 | Q4FZB7         | SV2A    | Q7L0J3            | TAX1BP1  | Q86VP1             |
| TBX5     | Q99593         | TDRKH   | Q9Y2W6            | TERT     | O14746             |
| TLE4     | Q04727         | TNS3    | Q68CZ2            | TOR1A    | O14656             |
| TOR1B    | O14656, O14657 | TPM3    | P06753,<br>P09493 | TRDMT1   | O14717             |
| TRIM26   | Q12899         | TRIM31  | Q9BZY9            | TRIM8    | Q9BZR9             |
| TTL12    | Q14166         | TUBA1B  | P68363            | TUBA1C   | Q9BQE3             |
| UBE2R2   | Q712K3         | UGP2    | Q16851            | USP20    | Q9Y2K6             |
| USP39    | Q53GS9         | VAMP8   | Q9BV40            | VAR2     | P26640             |
| VP53     | Q5VIR6         | WIF1    | Q9Y5W5            | WTAP     | Q15007             |
| ZFP36L1  | Q07352         | ZNF266  | Q14584            | ZNRD1    | Q9P1U0             |
| ZRANB1   | Q9UGI0         |         |                   |          |                    |

| Input    | Ensembl Id      | Input    | Ensembl Id                          | Input    | Ensembl Id                          |
|----------|-----------------|----------|-------------------------------------|----------|-------------------------------------|
| ASNS     | ENSG00000070669 | ATM      | ENSG00000149311,<br>ENST00000278616 | CDKN1B   | ENSG00000111276                     |
| GRHL1    | ENSG00000134317 | HLA-A    | ENSG00000206503                     | HLA-C    | ENSG00000204525                     |
| HLA-DQA1 | ENSG00000196735 | HLA-DQA2 | ENSG00000237541                     | HLA-DQB1 | ENSG00000179344                     |
| HLA-DQB2 | ENSG00000232629 | HLA-DRB1 | ENSG00000196126                     | HLA-DRB5 | ENSG00000198502                     |
| HLA-E    | ENSG00000204592 | HLA-F    | ENSG00000204642                     | HLA-G    | ENSG00000204632                     |
| HLA-H    | ENSG00000206341 | HNF1B    | ENSG00000275410                     | KDM6B    | ENSG00000132510                     |
| KLK2     | ENSG00000167751 | KLK3     | ENSG00000142515                     | MRPL18   | ENSG00000112110                     |
| MYB      | ENSG00000118513 | MYC      | ENSG00000136997                     | NOTCH4   | ENSG00000206312,<br>ENST00000383264 |
| PDCD4    | ENSG00000150593 | PMVK     | ENSG00000163344                     | SESN1    | ENSG00000080546                     |
| TRIM26   | ENSG00000234127 | TRIM31   | ENSG00000204616                     | TRIM8    | ENSG00000171206                     |

## Most significant pathways including HLA genes:

The following table shows the 25 most relevant pathways sorted by p-value.

| Pathway name                                                               | Entities   |          |          |          | Reactions |          |
|----------------------------------------------------------------------------|------------|----------|----------|----------|-----------|----------|
|                                                                            | found      | ratio    | p-value  | FDR*     | found     | ratio    |
| Endosomal/Vacuolar pathway                                                 | 40 / 82    | 0.004    | 1.11e-16 | 2.10e-14 | 4 / 4     | 3.34e-04 |
| Antigen Presentation: Folding, assembly and peptide loading of class I MHC | 40 / 217   | 0.011    | 1.11e-16 | 2.10e-14 | 13 / 16   | 0.001    |
| ER-Phagosome pathway                                                       | 43 / 298   | 0.015    | 1.11e-16 | 2.10e-14 | 7 / 10    | 8.34e-04 |
| Antigen processing-Cross                                                   | 44 / 320   | 0.016    | 1.11e-16 | 2.10e-14 | 12 / 23   | 0.002    |
| Interferon gamma signaling                                                 | 81 / 427   | 0.021    | 1.11e-16 | 2.10e-14 | 4 / 15    | 0.001    |
| Interferon Signaling                                                       | 87 / 957   | 0.048    | 1.11e-16 | 2.10e-14 | 16 / 66   | 0.006    |
| Interferon alpha/beta signaling                                            | 49 / 388   | 0.019    | 1.11e-16 | 2.10e-14 | 4 / 20    | 0.002    |
| PD-1 signaling                                                             | 19 / 74    | 0.004    | 9.80e-14 | 1.63e-11 | 1 / 4     | 3.34e-04 |
| Translocation of ZAP-70 to Immunological synapse                           | 19 / 79    | 0.004    | 3.03e-13 | 4.46e-11 | 4 / 4     | 3.34e-04 |
| Phosphorylation of CD3 and TCR zeta                                        | 19 / 95    | 0.005    | 7.04e-12 | 9.30e-10 | 5 / 7     | 5.84e-04 |
| Immunoregulatory interactions between a Lymphoid and a non-Lymphoid cell   | 50 / 621   | 0.031    | 6.64e-09 | 7.39e-07 | 17 / 43   | 0.004    |
| Class I MHC mediated antigen                                               | 46 / 670   | 0.034    | 6.72e-09 | 7.39e-07 | 30 / 48   | 0.004    |
| MHC class II antigen presentation                                          | 25 / 281   | 0.014    | 6.25e-08 | 6.38e-06 | 25 / 26   | 0.002    |
| Generation of second messenger                                             | 22 / 289   | 0.014    | 1.39e-04 | 0.013    | 10 / 17   | 0.001    |
| Downstream TCR signaling                                                   | 27 / 351   | 0.018    | 2.25e-04 | 0.02     | 6 / 24    | 0.002    |
| Signaling by FGFR2 IIIa TM                                                 | 5 / 30     | 0.002    | 9.82e-04 | 0.082    | 2 / 2     | 1.67e-04 |
| Adaptive Immune System                                                     | 92 / 2,019 | 0.101    | 0.002    | 0.119    | 113 / 261 | 0.022    |
| TCF7L2 mutants don't bind CTBP                                             | 2 / 3      | 1.50e-04 | 0.003    | 0.189    | 1 / 1     | 8.34e-05 |
| Costimulation by the CD28 family                                           | 22 / 379   | 0.019    | 0.003    | 0.224    | 5 / 34    | 0.003    |
| Activation of Matrix                                                       | 6 / 65     | 0.003    | 0.006    | 0.393    | 17 / 27   | 0.002    |
| CASP8 activity is inhibited                                                | 4 / 15     | 7.52e-04 | 0.006    | 0.4      | 3 / 3     | 2.50e-04 |
| Assembly of collagen fibrils and                                           | 6 / 74     | 0.004    | 0.011    | 0.649    | 11 / 26   | 0.002    |
| FGFR2 mutant receptor activation                                           | 6 / 81     | 0.004    | 0.016    | 0.902    | 17 / 18   | 0.002    |
| Pyrophosphate hydrolysis                                                   | 2 / 8      | 4.01e-04 | 0.017    | 0.902    | 2 / 2     | 1.67e-04 |

| Pathway name                         | Entities |          |         |       | Reactions |          |
|--------------------------------------|----------|----------|---------|-------|-----------|----------|
|                                      | found    | ratio    | p-value | FDR*  | found     | ratio    |
| Aryl hydrocarbon receptor signalling | 2 / 8    | 4.01e-04 | 0.017   | 0.902 | 2 / 5     | 4.17e-04 |

\* False Discovery Rate

## Most significant pathways excluding HLA genes:

The following table shows the 25 most relevant pathways sorted by p-value.

| Pathway name                                                                           | Entities |          |          |       | Reactions |          |
|----------------------------------------------------------------------------------------|----------|----------|----------|-------|-----------|----------|
|                                                                                        | found    | ratio    | p-value  | FDR*  | found     | ratio    |
| Signaling by FGFR2 IIIa TM                                                             | 5 / 30   | 0.002    | 4.84e-04 | 0.64  | 2 / 2     | 1.67e-04 |
| TCF7L2 mutants don't bind CTBP                                                         | 2 / 3    | 1.50e-04 | 0.002    | 0.934 | 1 / 1     | 8.34e-05 |
| Activation of Matrix Metalloproteinases                                                | 6 / 65   | 0.003    | 0.003    | 0.934 | 17 / 27   | 0.002    |
| CASP8 activity is inhibited                                                            | 4 / 15   | 7.52e-04 | 0.004    | 0.934 | 3 / 3     | 2.50e-04 |
| Assembly of collagen fibrils and other multimeric structures                           | 6 / 74   | 0.004    | 0.005    | 0.934 | 11 / 26   | 0.002    |
| FGFR2 mutant receptor activation                                                       | 6 / 81   | 0.004    | 0.008    | 0.934 | 17 / 18   | 0.002    |
| Collagen formation                                                                     | 8 / 142  | 0.007    | 0.011    | 0.934 | 36 / 77   | 0.006    |
| Pyrophosphate hydrolysis                                                               | 2 / 8    | 4.01e-04 | 0.013    | 0.934 | 2 / 2     | 1.67e-04 |
| Aryl hydrocarbon receptor signalling                                                   | 2 / 8    | 4.01e-04 | 0.013    | 0.934 | 2 / 5     | 4.17e-04 |
| Collagen degradation                                                                   | 5 / 75   | 0.004    | 0.022    | 0.934 | 13 / 34   | 0.003    |
| Carboxyterminal post-translational modifications of tubulin                            | 4 / 52   | 0.003    | 0.025    | 0.934 | 6 / 6     | 5.01e-04 |
| Regulation by c-FLIP                                                                   | 3 / 12   | 6.02e-04 | 0.027    | 0.934 | 4 / 4     | 3.34e-04 |
| Degradation of the extracellular matrix                                                | 9 / 202  | 0.01     | 0.029    | 0.934 | 45 / 105  | 0.009    |
| FGFR2 ligand binding and activation                                                    | 4 / 55   | 0.003    | 0.03     | 0.934 | 4 / 5     | 4.17e-04 |
| Caspase activation via Death Receptors in the presence of ligand                       | 5 / 35   | 0.002    | 0.038    | 0.934 | 9 / 9     | 7.51e-04 |
| Regulation of necroptotic cell death                                                   | 4 / 37   | 0.002    | 0.044    | 0.934 | 4 / 5     | 4.17e-04 |
| Microtubule-dependent trafficking of connexons from Golgi to the plasma membrane       | 2 / 22   | 0.001    | 0.079    | 0.934 | 1 / 2     | 1.67e-04 |
| Tandem of pore domain in a weak inwardly rectifying K <sup>+</sup> channels (TWIK)     | 1 / 4    | 2.01e-04 | 0.081    | 0.934 | 1 / 1     | 8.34e-05 |
| Transport of connexons to the plasma membrane                                          | 2 / 23   | 0.001    | 0.085    | 0.934 | 1 / 3     | 2.50e-04 |
| Dimerization of procaspase-8                                                           | 4 / 26   | 0.001    | 0.104    | 0.934 | 3 / 3     | 2.50e-04 |
| SHC-mediated cascade:FGFR2                                                             | 4 / 85   | 0.004    | 0.106    | 0.934 | 4 / 4     | 3.34e-04 |
| Defective LFNG causes SCDO3                                                            | 1 / 6    | 3.01e-04 | 0.118    | 0.934 | 1 / 1     | 8.34e-05 |
| Defective AVP does not bind AVPR2 and causes neurohypophyseal diabetes insipidus (NDI) | 1 / 6    | 3.01e-04 | 0.118    | 0.934 | 1 / 1     | 8.34e-05 |
| Activated point mutants of FGFR2                                                       | 3 / 58   | 0.003    | 0.124    | 0.934 | 9 / 10    | 8.34e-04 |

| Pathway name                                      | Entities |          |         |       | Reactions |          |
|---------------------------------------------------|----------|----------|---------|-------|-----------|----------|
|                                                   | found    | ratio    | p-value | FDR*  | found     | ratio    |
| Defective Mismatch Repair<br>Associated With MSH2 | 1 / 7    | 3.51e-04 | 0.137   | 0.934 | 1 / 2     | 1.67e-04 |

\* False Discovery Rate
